# Supplementary material for: Surface engineering of gadolinium oxide nanoseeds with nitrogen-doped carbon quantum dots: an efficient nanocomposite for precise detection of antibiotic drug clioquinol
Source: Royal Society of Chemistry journal article supplement (doi:10.1039/d1nj05243h), 2022-01-01
Supplement: d1nj05243h1.pdf [file d1nj05243h1.pdf]

### **Supporting Information**

## **Surface Engineering of Gadolinium Oxide Nanoseeds With Nitrogen-Doped Carbon Quantum Dots: An Efficient Nanocomposite for Precise Detection of Antibiotic Drug Clioquinol**

Ramadhass Keerthika Devi <sup>a</sup>, Muthusankar Ganesan <sup>b,c</sup>, Tse-Wei Chen <sup>d</sup>, Shen-Ming Chen <sup>a,\*</sup>, Xiaoheng Liu<sup>e,\*</sup>, M. Ajmal Ali<sup>f</sup>, Saeedah M. Almutairif, Murugan Sethupathi<sup>c</sup>

<sup>a</sup> *Department of Chemical Engineering and Biotechnology, College of Engineering, National Taipei University of Technology, No.1, Section 3, Chung-Hsiao East Road, Taipei 106, Taiwan, ROC*

<sup>b</sup> *Department of Mechanical Engineering, National Taipei University of Technology, Taiwan, ROC.*

<sup>c</sup> *Department of Industrial Chemistry, Alagappa University, Karaikudi-630003, Tamil Nadu, India.*

<sup>d</sup> *Department of Materials, Imperial College London, London, SW72AZ, United Kingdom.*

<sup>e</sup> *Key Laboratory of Education Ministry for Soft Chemistry and Functional Materials, Nanjing University of Science and Technology, Nanjing 210094, China*

<sup>f</sup> *Department of Botany and Microbiology, College of Science, King Saud University, Riyadh 11451, Saudi Arabia*

\*Corresponding author: e-mail: [smchen78@ms15.hinet.net](mailto:smchen78@ms15.hinet.net), [smchen1957@gmail.com](mailto:smchen1957@gmail.com), (S.-M. Chen), [xhliu@mail.njust.edu.cn](mailto:xhliu@mail.njust.edu.cn) (Xiaoheng Liu)

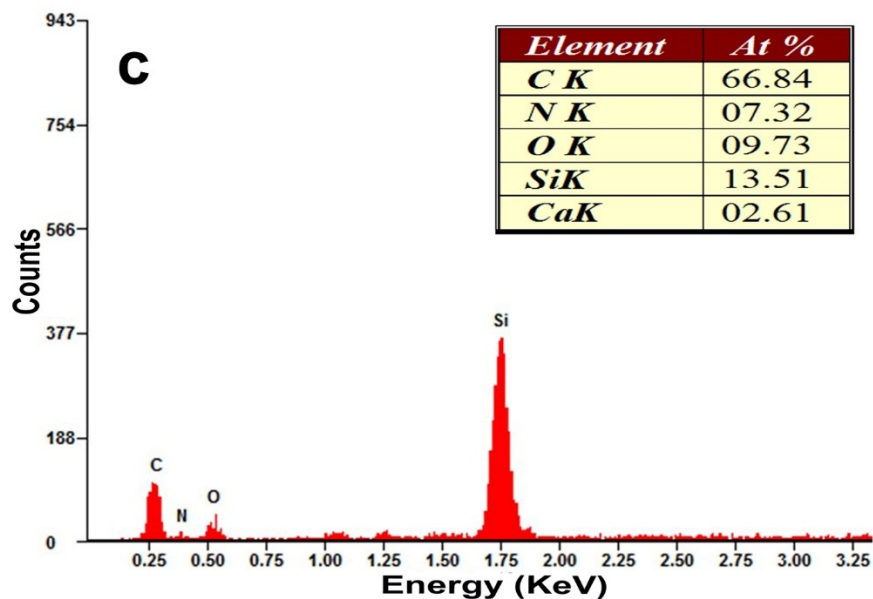

Fig. S1. EDX result of N-CQD.

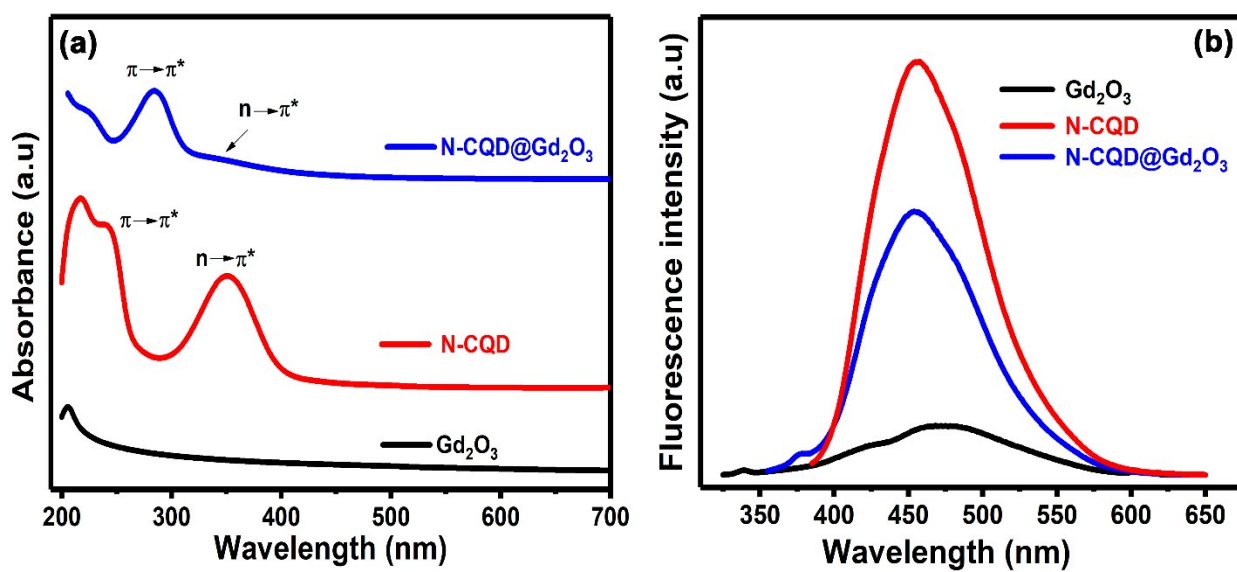

Fig. S2. (a) UV-Vis, and (b) fluorescence spectra of N-CQDs,  $Gd_2O_3$  nanorod, N-CQD@ $Gd_2O_3$  nanoseeds.

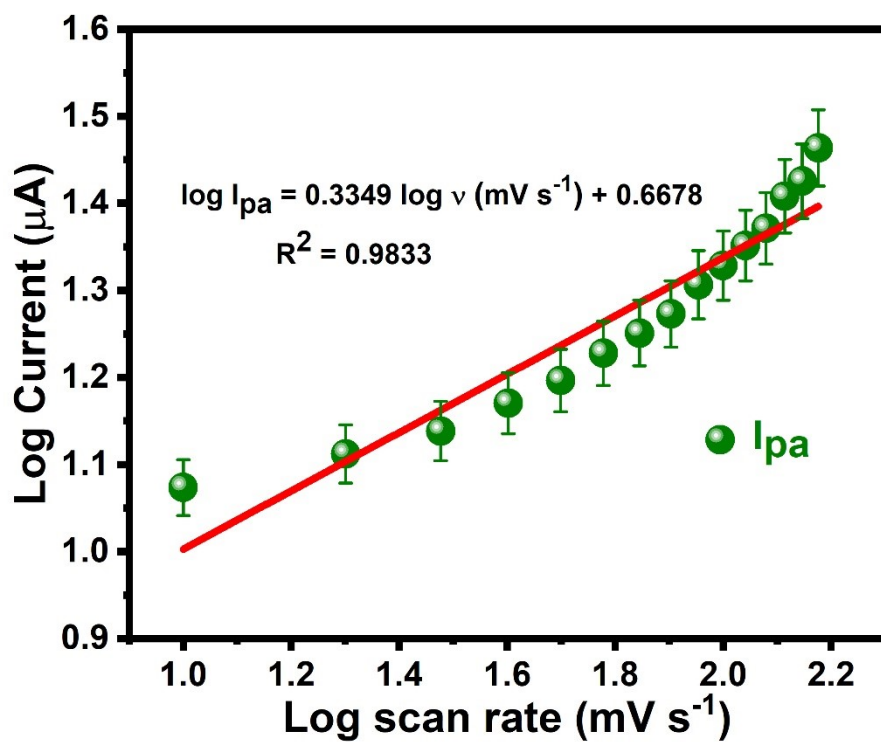

Fig. S3. Plot of log scan rate vs. log current.
